# Supplementary material
Source: Copernicus journal article supplement (doi:10.5194/egusphere-2026-2663)
Supplement: Supplementary file 1 [file egusphere-2026-2663-supplement.pdf]

1 Supplementary Information for  
2 **Development of an offline Aerosol Mass Spectrometry methodology for organic aerosol**  
3 **characterization in a globally distributed Surface Particulate Matter Network**  
4 Yuxuan Ren et al.  
5 Correspondence to: Lu Xu (xu1@wustl.edu) and Randall V. Martin (rvmartin@wustl.edu)  
6 **Contents of this file**  
7 This Supplementary Information contains Text S1 to Text S4, Table S1 and Table S2, and  
8 Figures S1 to S10.

## 9 Text S1. Nebulization Efficiency

10 Nebulization efficiency (NE) is defined as the ratio of AMS-measured mass to the mass of  
11 solute nebulized for each component. We quantify NE by nebulizing 2 mL of binary solutions  
12 containing varying proportions of sulfate and organic species at a fixed total solute  
13 concentration of 40 mg/L. The organic species examined include glucose, DL-4-hydroxy-3-  
14 methoxymandelic acid (HMMA), and poly(ethylene glycol) (PEG-400). Figure S3 shows the  
15 relationship between solution mass and NE for sulfate and the organic species. NE ranges from  
16 0.70–1.1 % for glucose, 0.43–1.0 % for HMMA, and 1.5–3.8 % for PEG-400, while sulfate  
17 NE ranges from 0.23–1.3 %. Differences in NE among the organic species are likely associated  
18 with variations in their relative ionization efficiency (RIE). For a given organic species at a  
19 fixed total solute concentration in binary solutions, NE varies with the organic-to-sulfate ratio.  
20 The highest NE for both organic and sulfate components occurs at an organic-to-sulfate ratio  
21 of 0.28 for glucose and HMMA, and 2.0 for PEG-400. This behavior may reflect AMS matrix  
22 effects, however, confirming this would require additional laboratory investigation beyond the  
23 scope of this study using the standard AMS vaporizer (Xu et al., 2018).

## 24 Text S2. Error Propagation

25 Uncertainties in the offline AMS quantification are propagated through each step of the  
26 calculation using standard error propagation. Each filter extract generates 8–12 AMS runs  
27 using the current nebulization system.

28 For each filter extract, the uncertainty in the mean AMS concentration for species  $i$  is calculated  
29 as:

$$30 \sigma_{\bar{I}_{i,AMS}} = \frac{1}{N} \sqrt{\sum_{k=1}^N (0.2I_{k,i})^2} \quad (1)$$

$$31 \sigma_{\bar{I}_i} = \sqrt{\sigma_{\bar{I}_{i,AMS}}^2 + \sigma_{\bar{I}_{i,rep}}^2} \quad (2)$$

32 where  $\sigma_{\bar{I}_{i,AMS}}$  represents AMS measurement uncertainty, with a relative measurement  
33 uncertainty of 20 % applied to each run  $k$  for all species following Bahreini et al. (2009) and  
34 Middlebrook et al. (2012), and  $\sigma_{\bar{I}_{i,rep}}$  is estimated as the standard deviation across  $N$  runs for  
35 species  $i$  representing reproducibility.

36 The uncertainty in the blank-corrected mean AMS concentration for species  $i$  is calculated as:

$$37 \sigma_{\Delta I_i} = \sqrt{\sigma_{\bar{I}_i}^2 + \sigma_{\bar{I}_{i,LB}}^2} \quad (3)$$

38 where  $\sigma_{\bar{I}_{i,LB}}$  is the uncertainty in the corresponding mean laboratory blank (LB) concentration  
 39 for species  $i$ , calculated using the same approach as for the sample runs.

40 The uncertainty in organic-to-sulfate ratio measured by AMS for each extract is calculated as:

$$41 \quad \sigma_{\phi_{AMS}} = \phi_{AMS} \sqrt{\left(\frac{\sigma_{\Delta I_{OA}}}{\Delta I_{OA}}\right)^2 + \left(\frac{\sigma_{\Delta I_{sulfate}}}{\Delta I_{sulfate}}\right)^2} \quad (4)$$

42 where  $\phi_{AMS} = \Delta I_{OA} / \Delta I_{sulfate}$  is the organic-to-sulfate ratio for the filter extract.

43 The uncertainty in the calibrated organic-to-sulfate ratio in the extract,  $\sigma_{\phi_{extract}}$ , is estimated  
 44 by combining the propagated uncertainty from  $\phi_{AMS}$  and uncertainty associated with calibration  
 45 curve:

$$46 \quad \sigma_{\phi_{extract}} = \sqrt{\sigma_{\phi_{extract,AMS}}^2 + \sigma_{\phi_{extract,cal}}^2} = \sqrt{(f'(\phi_{AMS})\sigma_{\phi_{AMS}})^2 + (0.2\phi_{extract})^2} \quad (5)$$

47 where  $f'(\phi_{AMS}) = \frac{1}{\sqrt{1.9912 + 0.24\phi_{AMS}}}$  is the derivative of the inverse calibration function

48 evaluated at  $\phi_{AMS}$ . The inverse calibration function is  $\phi_{extract} = \frac{-1.4 + \sqrt{1.9912 + 0.24\phi_{AMS}}}{0.12}$ ,

49 corresponding to the calibration relationship  $\phi_{AMS} = 0.060\phi_{extract}^2 + 1.4\phi_{extract} - 0.13$ .

50 The calibration uncertainty  $\sigma_{\phi_{extract,cal}}$  is represented as a 20 % relative uncertainty (Section  
 51 3.2) and scaled to  $\phi_{extract}$ .

52 Finally, the relative uncertainty in the offline OA concentration is calculated as:

$$53 \quad \frac{\sigma_{C_{OA,offline}}}{C_{OA,offline}} = \sqrt{\left(\frac{\sigma_{\phi_{extract}}}{\phi_{extract}}\right)^2 + \left(\frac{\sigma_{C_{sulfate,extract}}}{C_{sulfate,extract}}\right)^2 + \left(\frac{\sigma_{V_{extract}}}{V_{extract}}\right)^2 + \left(\frac{\sigma_{V_{air}}}{V_{air}}\right)^2} \quad (6)$$

54 where  $\frac{\sigma_{C_{sulfate,extract}}}{C_{sulfate,extract}}$  represents the relative uncertainty in sulfate concentration in the extract,

55 estimated from the analytical precision of Ion Chromatography (IC) sulfate measurements  
 56 (2.5 %). The relative uncertainty in extract volume,  $\frac{\sigma_{V_{extract}}}{V_{extract}}$ , is estimated from syringe

57 dispensing precision (2.7 %). The relative uncertainty in sampled air volume,  $\frac{\sigma_{V_{air}}}{V_{air}}$ , is estimated

58 as the relative standard deviation from 120 flow rate measurements of six flow meters (3.5 %)

59 (Liu et al., 2024).

### 60 **Text S3. Statistics Calculation**

61 We use the ordinary least-squares or reduced major axis fit ( $y$ ), coefficient of determination  
 62 ( $r^2$ ), normalized mean bias (NMB), and normalized root mean square difference (NRMSD) to

63 evaluate concentrations derived from the offline AMS methodology ( $C_{offline}$ ) against co-located  
 64 online AMS measurements ( $C_{online}$ ) across a total of  $N$  samples.

$$65 \quad NMB = \frac{\sum_{i=1}^N (C_{offline,i} - C_{online,i})}{\sum_{i=1}^N C_{online,i}} \quad (7)$$

$$66 \quad NRMSD = \frac{\sqrt{\sum_{i=1}^N (C_{offline,i} - C_{online,i})^2}}{\sum_{i=1}^N C_{online,i}} \quad (8)$$

67 where  $C_{offline,i}$  is the OA concentration determined using the offline AMS methodology for filter  
 68 sample  $i$ , and  $C_{online,i}$  is the corresponding OA concentration from online AMS measurements  
 69 averaged over the filter sampling period.

70 We perform weighted non-negative least squares (NNLS) regression to quantify factor  
 71 contributions to offline AMS measurements.

72 At each time step  $t$ , the offline AMS OA mass spectra is represented as a linear combination  
 73 of fixed factor profiles derived from online positive matrix factorization (PMF) analysis:

$$74 \quad \mathbf{y}_t \approx \mathbf{F}\boldsymbol{\beta}(t) \quad (9)$$

75 where  $\mathbf{y}_t$  is the offline OA spectra,  $\mathbf{F}$  is the online-derived factor profiles, and  $\boldsymbol{\beta}(t)$  is the time-  
 76 dependent factor contributions, constrained to be non-negative.

77 To account for measurement uncertainty, regression is performed using uncertainty-weighted  
 78 NNLS:

$$79 \quad \min_{\boldsymbol{\beta}(t) \geq 0} \sum_{j=1}^M \left( \frac{y_{t,j} - \sum_{k=1}^K F_{t,j} \beta_k(t)}{\sigma_{t,j}} \right)^2 \quad (10)$$

80 where  $\sigma_{t,j}$  is the uncertainty of the offline signal at  $m/z$  bin  $j$ .

81 The weighted problem is then converted by scaling observations and factor profiles by their  
 82 uncertainties:

$$83 \quad y'_{t,j} = \frac{y_{t,j}}{\sigma_{t,j}}, F'_{t,j} = \frac{F_{t,j}}{\sigma_{t,j}} \quad (11)$$

84 yielding:

$$85 \quad \min_{\boldsymbol{\beta}(t) \geq 0} \|\mathbf{y}'_t - \mathbf{F}'\boldsymbol{\beta}(t)\|_2^2 \quad (12)$$

#### 86 **Text S4. Inorganic Ion Evaluation and Sampling Effects**

87 We conduct a pilot study to evaluate offline AMS measurements with co-located online AMS  
 88 measurements and complementary offline measurements. In addition to OA and sulfate  
 89 discussed in [Section 3.3.2](#), ammonium and nitrate are further evaluated here. Offline AMS  
 90 ammonium and nitrate are quantified using sulfate as the internal standard, following the same

91 approach as for OA, with the assumption of a unity calibration slope between ammonium-to-  
92 sulfate and nitrate-to-sulfate ratios in the extract and in the AMS. Ammonium determined by  
93 the offline AMS method shows strong agreement with IC measurements, with a slope of 1.1  
94 and  $r^2$  of 0.93 (Figure S8d), supporting the reliability of the offline quantification. In contrast,  
95 we find poor agreement between offline and online AMS for both ammonium and nitrate  
96 (Figure S8c and Figure S8e), likely reflecting measurement uncertainties, volatilization losses,  
97 and interferences associated with filter-based sampling and extraction. To enable a more direct  
98 comparison with IC measurements of inorganic nitrate, total nitrate from offline AMS is further  
99 partitioned using the  $\text{NO}^+/\text{NO}_2^+$  ratio method (Day et al., 2002; Farmer et al., 2010; Xu et al.,  
100 2015). In this approach, the  $\text{NO}^+/\text{NO}_2^+$  ratio for ammonium nitrate is  $1.8 \pm 0.16$  based on  
101 instrument-specific ionization efficiency calibration, while the ratio for organic nitrates is  
102 assumed to be 2.25 (range 2.08–3.99) times higher than that of ammonium nitrate. Based on  
103 this approach, inorganic nitrate accounts for  $52 \pm 19$  % of total offline AMS nitrate (mean  $\pm$   
104 standard deviation), with a median of 49 % (39 % and 68 % for the first and third quartiles,  
105 respectively). Despite this correction, offline AMS-derived nitrate remains systematically  
106 higher than IC nitrate (Figure S8f), likely reflecting uncertainties in the inorganic nitrate  
107 apportionment and the low IC nitrate concentrations approaching detection limits.

108 Differences in sampled particle size do not substantially affect online-offline agreement, as  
109 filters corresponding to  $\text{PM}_{2.5}$  and  $\text{PM}_1$  cut sizes yield comparable OA recoveries (Figure S10).  
110 This observation is consistent with prior findings that 91 % of sulfate and 86 % of organic  
111 carbon  $\text{PM}_{2.5}$  mass are within the  $\text{PM}_1$  size range (Li et al., 2025). Evaporation losses of volatile  
112 and semi-volatile species during filter collection may also contribute to differences between  
113 online and offline measurements. However, such losses are generally recognized as an inherent  
114 limitation of filter-based sampling approaches and are therefore not quantified here (Srivastava  
115 et al., 2021).

116 **Supplementary Tables**

117 Table S1. Analyte concentrations for each solution in calibration curves. Solutions are prepared from stock solutions of ammonium sulfate (AS),  
 118 glucose, DL-4-hydroxy-3-methoxymandelic acid (HMMA), and poly(ethylene glycol) (PEG-400).

| Sample | Organics | AS Volume (mL) | Organic Volume (mL) | Ultrapure Water Volume (mL) | Total Volume (mL) | Total Concentration (mg/L) | AS Concentration (mg/L) | Organic Concentration (mg/L) | Solution Organic-to-sulfate Ratio |
|--------|----------|----------------|---------------------|-----------------------------|-------------------|----------------------------|-------------------------|------------------------------|-----------------------------------|
| G1     | Glucose  | 0.1            | 1                   | 1.65                        | 2.75              | 40                         | 3.6                     | 36.4                         | 14                                |
| G2     | Glucose  | 0.2            | 1                   | 1.8                         | 3                 | 40                         | 6.7                     | 33.3                         | 6.9                               |
| G3     | Glucose  | 0.5            | 1                   | 2.25                        | 3.75              | 40                         | 13.3                    | 26.7                         | 2.8                               |
| G4     | Glucose  | 0.7            | 1                   | 2.55                        | 4.25              | 40                         | 16.5                    | 23.5                         | 2.0                               |
| G5     | Glucose  | 1              | 1                   | 3                           | 5                 | 40                         | 20.0                    | 20.0                         | 1.4                               |
| G6     | Glucose  | 1              | 0.7                 | 2.55                        | 4.25              | 40                         | 23.5                    | 16.5                         | 1.0                               |
| G7     | Glucose  | 1              | 0.5                 | 2.25                        | 3.75              | 40                         | 26.7                    | 13.3                         | 0.69                              |
| G8     | Glucose  | 1              | 0.2                 | 1.8                         | 3                 | 40                         | 33.3                    | 6.7                          | 0.28                              |
| G9     | Glucose  | 1.5            | 0.2                 | 2.55                        | 4.25              | 40                         | 35.3                    | 4.7                          | 0.18                              |
| H1     | HMMA     | 0.1            | 1                   | 1.65                        | 2.75              | 40                         | 3.6                     | 36.4                         | 13.8                              |
| H2     | HMMA     | 0.2            | 1                   | 1.8                         | 3                 | 40                         | 6.7                     | 33.3                         | 6.9                               |
| H3     | HMMA     | 0.5            | 1                   | 2.25                        | 3.75              | 40                         | 13.3                    | 26.7                         | 2.8                               |
| H4     | HMMA     | 0.7            | 1                   | 2.55                        | 4.25              | 40                         | 16.5                    | 23.5                         | 2.0                               |
| H5     | HMMA     | 1              | 1                   | 3                           | 5                 | 40                         | 20.0                    | 20.0                         | 1.4                               |
| H6     | HMMA     | 1              | 0.7                 | 2.55                        | 4.25              | 40                         | 23.5                    | 16.5                         | 1.0                               |
| H7     | HMMA     | 1              | 0.5                 | 2.25                        | 3.75              | 40                         | 26.7                    | 13.3                         | 0.69                              |
| H8     | HMMA     | 1              | 0.2                 | 1.8                         | 3                 | 40                         | 33.3                    | 6.7                          | 0.28                              |
| H9     | HMMA     | 1.5            | 0.2                 | 2.55                        | 4.25              | 40                         | 35.3                    | 4.7                          | 0.18                              |
| P1     | PEG-400  | 0.1            | 1                   | 1.65                        | 2.75              | 40                         | 3.6                     | 36.4                         | 14                                |
| P2     | PEG-400  | 0.2            | 1                   | 1.8                         | 3                 | 40                         | 6.7                     | 33.3                         | 6.9                               |
| P3     | PEG-400  | 0.5            | 1                   | 2.25                        | 3.75              | 40                         | 13.3                    | 26.7                         | 2.8                               |
| P4     | PEG-400  | 0.7            | 1                   | 2.55                        | 4.25              | 40                         | 16.5                    | 23.5                         | 2.0                               |
| P5     | PEG-400  | 1              | 1                   | 3                           | 5                 | 40                         | 20.0                    | 20.0                         | 1.4                               |
| P6     | PEG-400  | 1              | 0.7                 | 2.55                        | 4.25              | 40                         | 23.5                    | 16.5                         | 1.0                               |
| P7     | PEG-400  | 1              | 0.5                 | 2.25                        | 3.75              | 40                         | 26.7                    | 13.3                         | 0.69                              |
| P8     | PEG-400  | 1              | 0.2                 | 1.8                         | 3                 | 40                         | 33.3                    | 6.7                          | 0.28                              |
| P9     | PEG-400  | 1.5            | 0.2                 | 2.55                        | 4.25              | 40                         | 35.3                    | 4.7                          | 0.18                              |

120 Table S2. Method detection limits (MDLs) of OA, sulfate, nitrate, ammonium, and chloride.  
 121 Online detection limits are determined from filtered air analyses. Offline detection limits are  
 122 calculated from ultrapure water blanks, field blanks, and laboratory blanks. *N* represents the  
 123 number of AMS runs included in each calculation.

|                                          |                  | <i>N</i> | OA   | Sulfate | Nitrate | Ammonium | Chloride |
|------------------------------------------|------------------|----------|------|---------|---------|----------|----------|
| Online ( $\mu\text{g}/\text{m}^3$ )      | Filtered air     | 357      | 0.17 | 0.031   | 0.015   | 0.0020   | 0.031    |
| Offline<br>( $\mu\text{g}/\text{m}^3$ )* | Ultrapure water  | 65       | 1.5  | 1.2     | 1.5     | 0.33     | 0.085    |
|                                          | Field blank      | 64       | 7.1  | 1.1     | 2.3     | 0.086    | 0.72     |
|                                          | Laboratory blank | 62       | 5.5  | 0.57    | 2.1     | 0.49     | 0.30     |

124 \* Offline MDLs are reported here in units of  $\mu\text{g}/\text{m}^3$ . To convert to mass on filter ( $\mu\text{g}$ ), the median  
 125 nebulization efficiency for each species is applied to convert the mass measured by the offline AMS to  
 126 the corresponding mass in solution.

127 **Supplementary Figures**

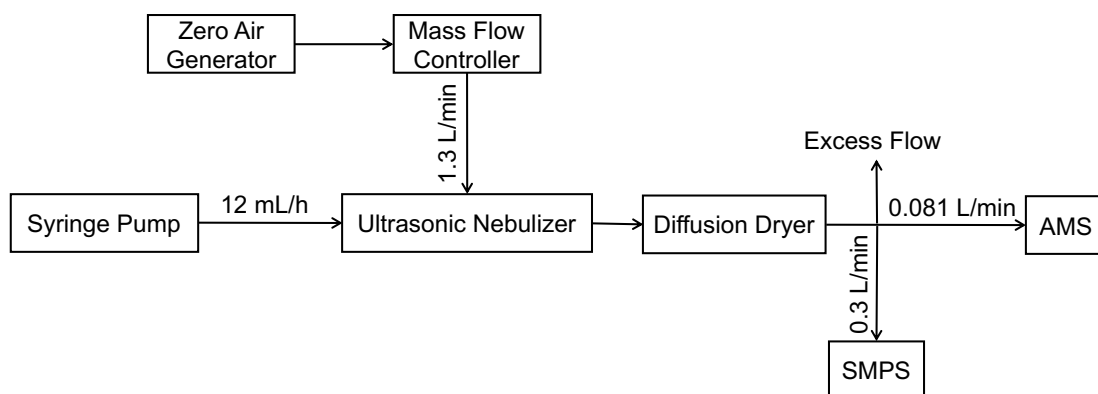

128

129 Figure S1. Simplified schematic of the setup for offline AMS methodology.

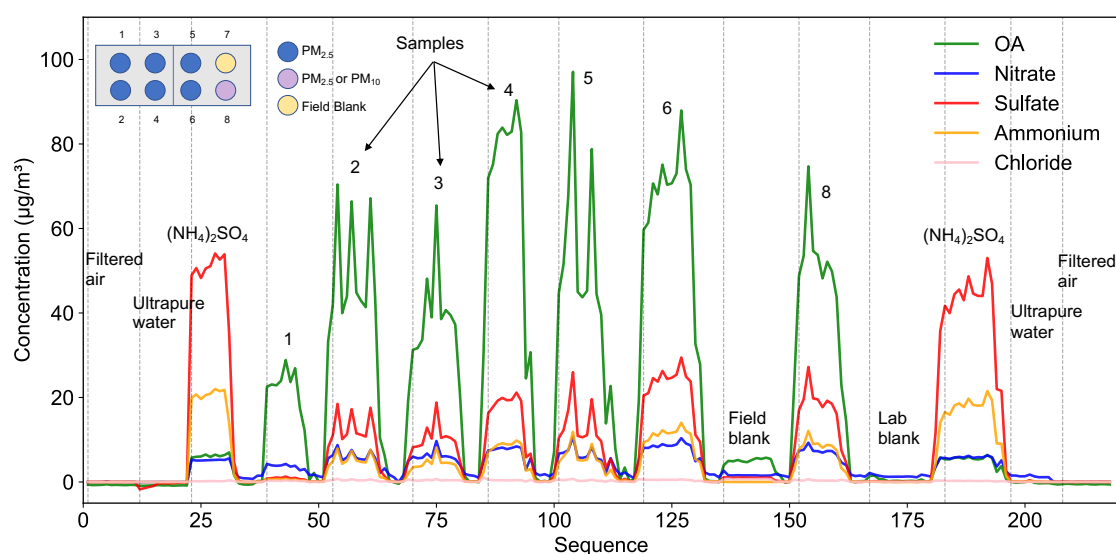

130

131 Figure S2. Representative AMS measurement cycle showing raw data for OA (green), nitrate  
 132 (blue), sulfate (red), ammonium (orange), and chloride (pink). Periods corresponding to filtered  
 133 air, ultrapure water, ammonium sulfate ((NH<sub>4</sub>)<sub>2</sub>SO<sub>4</sub>) solution, filter samples, field blanks, and  
 134 laboratory blanks are indicated. The top-left panel illustrates the SPARTAN cartridge  
 135 configuration, in which eight filters are assembled for site deployment, with filters 1 to 6 for  
 136 PM<sub>2.5</sub> samples, filter 8 for either a PM<sub>2.5</sub> or PM<sub>10</sub> sample depending on the protocol, and filter  
 137 7 left unexposed to airflow to serve as a field blank.

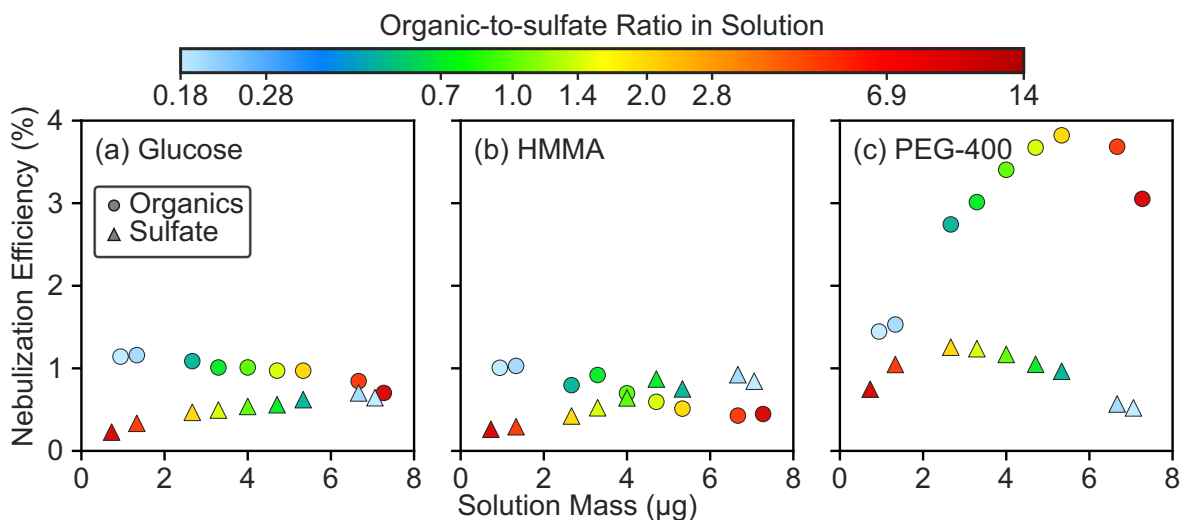

138

139 Figure S3. Solution mass loaded into the syringe compared to nebulization efficiency for  
 140 sulfate and organic components in binary solutions containing (a) glucose, (b) DL-4-Hydroxy-  
 141 3-methoxymandelic acid (HMMA), and (c) poly(ethylene glycol) (PEG-400). Organic  
 142 components are combined with sulfate across nine concentration levels, each prepared at a  
 143 fixed total solute concentration of 40 mg/L. Points are colored by the organic-to-sulfate ratio  
 144 in solution, with circles representing organic components and triangles representing sulfate.  
 145 Nebulization efficiency is defined as the ratio of AMS-measured mass to the mass of solute  
 146 nebulized for each component.

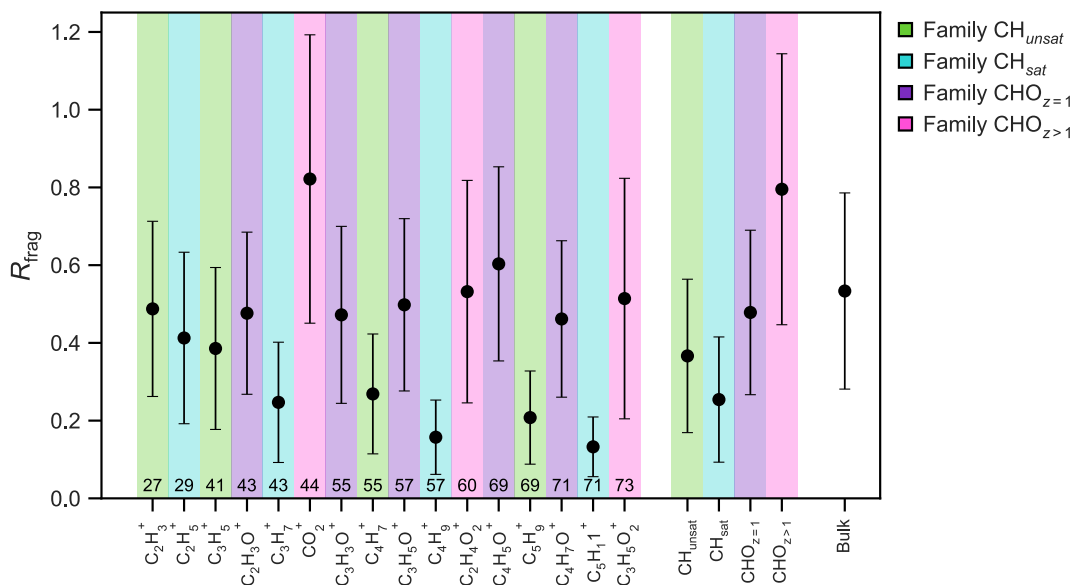

147

148 Figure S4. Recovery (mean  $\pm$  standard deviation) of individual organic fragments and chemical  
 149 families for samples collected in St. Louis. Recovery ( $R_{frag}$ ) is calculated as the ratio of offline  
 150 concentrations to the corresponding online measurements, with a value of 1 indicating 100 %  
 151 recovery. Fragments are color-coded by family, including mono-oxygenated ions ( $CHO_{z=1}$ ),  
 152 poly-oxygenated ions ( $CHO_{z>1}$ ), saturated hydrocarbons ( $CH_{sat}$ ), and unsaturated hydrocarbons  
 153 ( $CH_{unsat}$ ). Numbers inserted indicate the nominal mass of each fragment. Families include all  
 154 respective fragments weighted by their mass contribution.

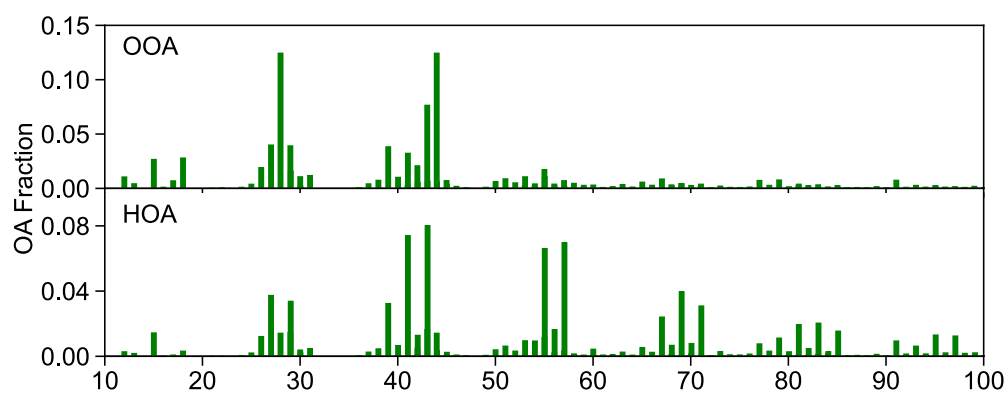

155

156 Figure S5. Factor profiles from the selected positive matrix factorization (PMF) solution  
 157 applied to online AMS measurements in St. Louis, resolving oxygenated OA (OOA) and  
 158 hydrocarbon-like OA (HOA).

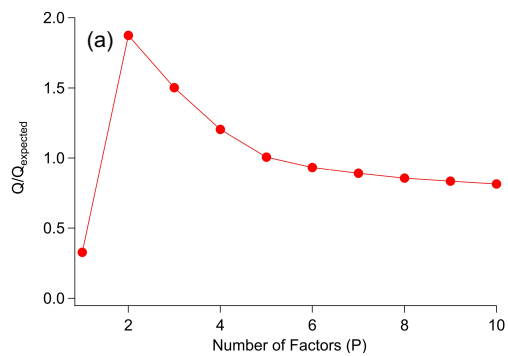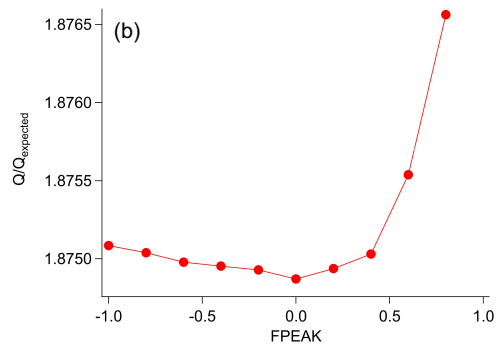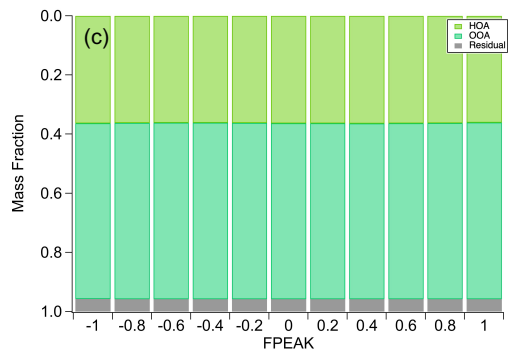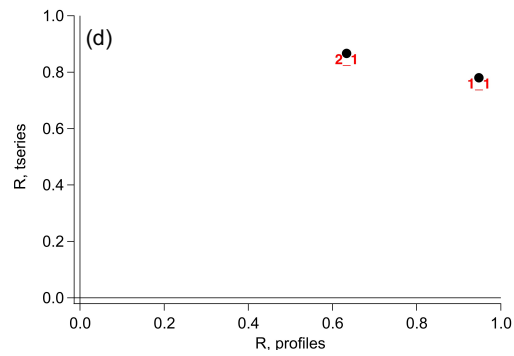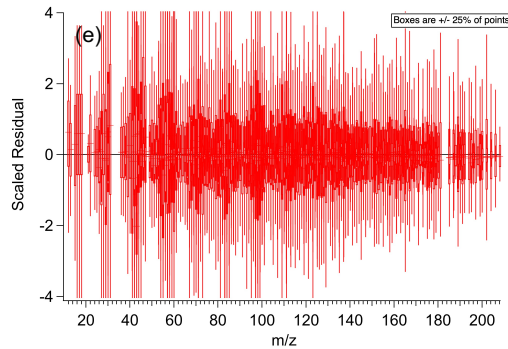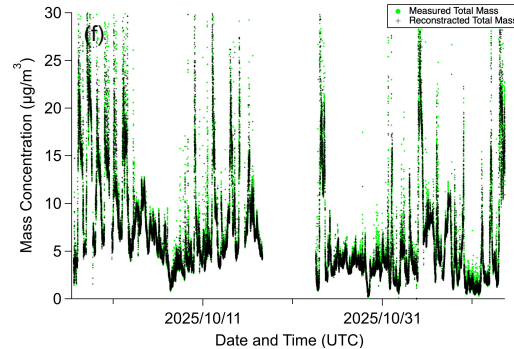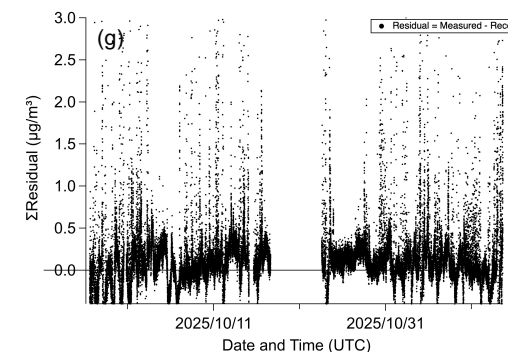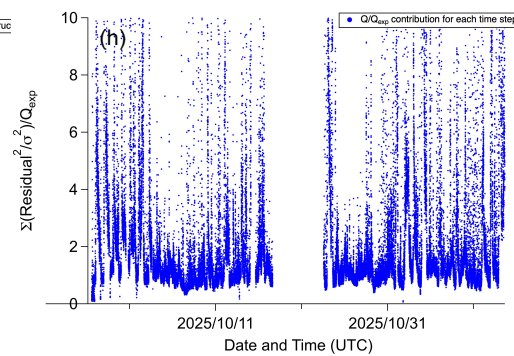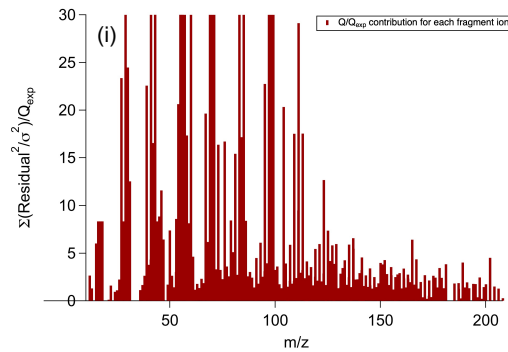

160 Figure S6. Summary of key diagnostic plots of the positive matrix factorization (PMF) analysis  
 161 of online samples collected in St. Louis. (a)  $Q/Q_{\text{exp}}$  as a function of the number of factors; (b)  
 162  $Q/Q_{\text{exp}}$  as a function of FPEAK for the 2-factor solution; (c) mass fraction of PMF factors as a  
 163 function of FPEAK; (d) correlations of time series and mass spectra among PMF factors; (e)  
 164 distribution of scaled residuals for each  $m/z$ , where boxes represent the interquartile range  
 165 (25th–75th percentile); (f) time series of measured and reconstructed organic mass; (g) residual  
 166 of the least-square fit as a function of time; (h)  $Q/Q_{\text{exp}}$  for each data point as a function of time,  
 167 and (i)  $Q/Q_{\text{exp}}$  values for each  $m/z$ .

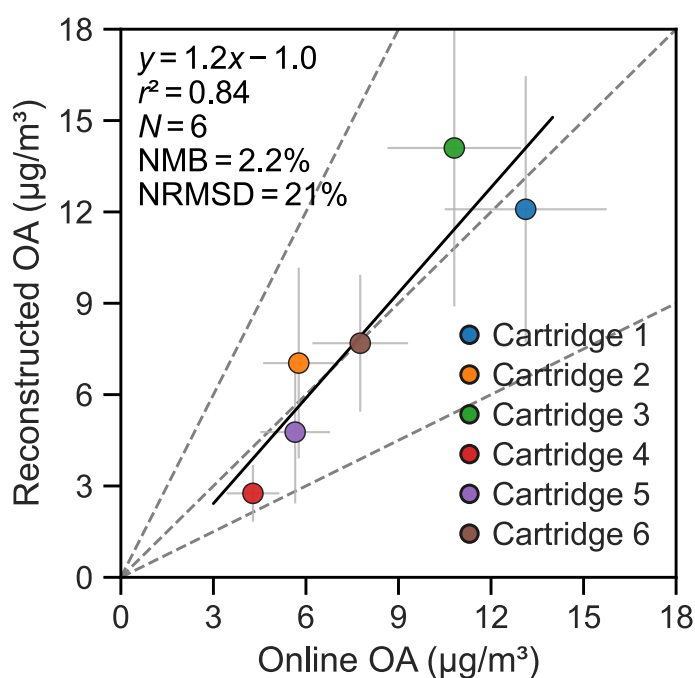

168  
 169 Figure S7. Comparison of reconstructed OA concentrations with online OA concentrations for  
 170 cartridges collected in St. Louis. Reconstructed OA concentrations are calculated by dividing  
 171 each offline-derived factor by its mean recovery. Horizontal bars indicate the estimated AMS  
 172 measurement uncertainty of online OA concentrations, while vertical bars indicate the  
 173 propagated uncertainty of offline OA concentrations. Data are shown as cartridge-level means  
 174 and are colored by cartridge. Annotations indicate the ordinary least-squares fit ( $y$ ), coefficient  
 175 of determination ( $r^2$ ), number of comparison points ( $N$ ), Normalized Mean Bias (NMB), and  
 176 Normalized Root Mean Square Deviation (NRMSD). Dashed lines indicate reference lines  
 177 with slopes of 0.5, 1, and 2.

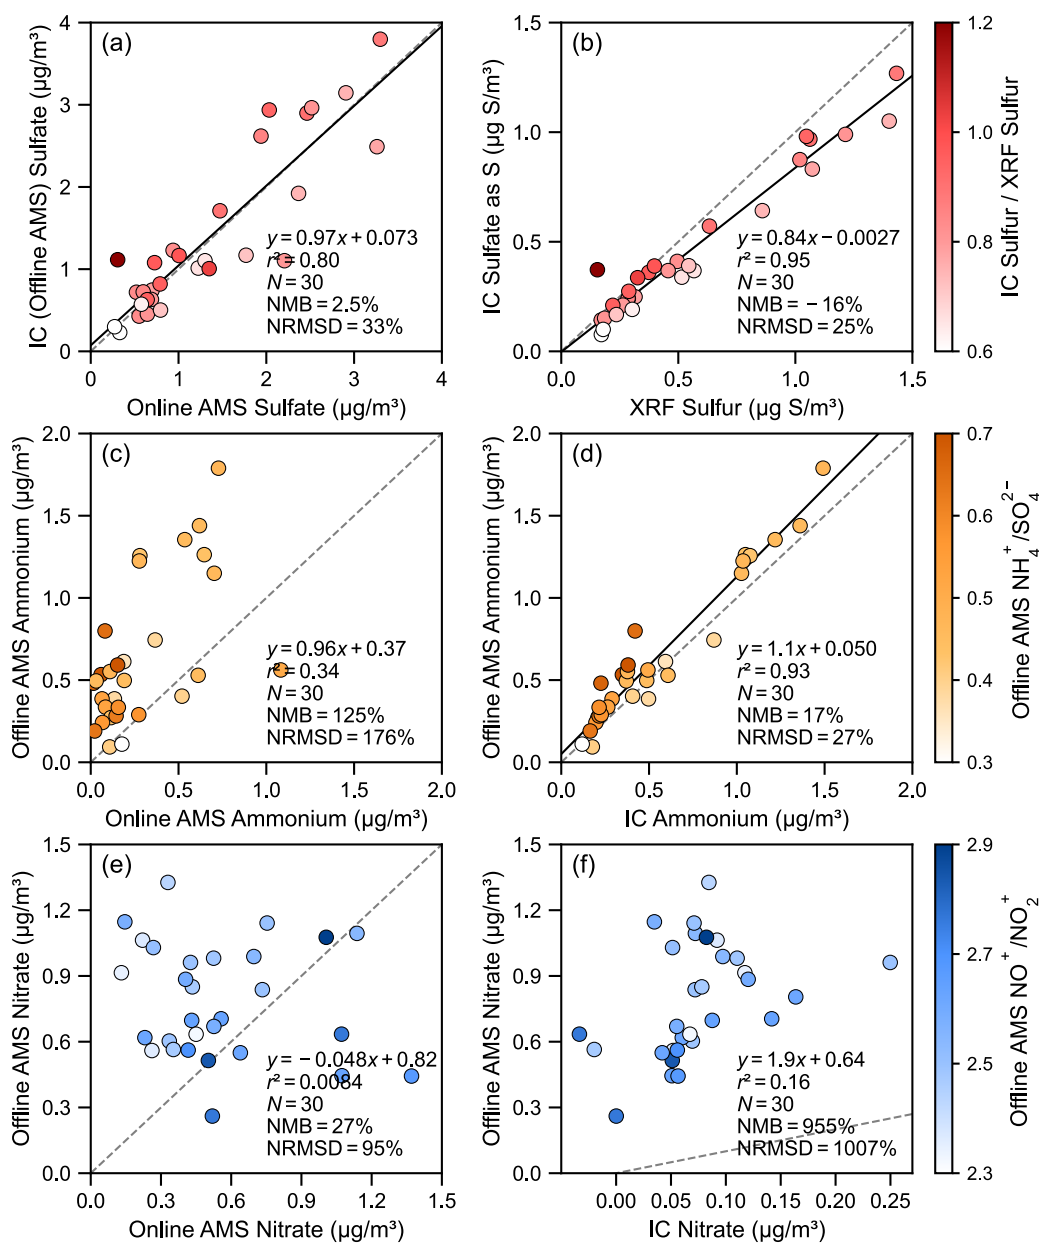

178

179 Figure S8. Comparison of sulfate, ammonium, and nitrate concentrations derived from offline  
 180 AMS with co-located online AMS and complementary offline measurements for samples  
 181 collected in St. Louis. Panels (a), (c), and (e) compare offline AMS with online AMS for sulfate,  
 182 ammonium, and nitrate, respectively, panel (b) compares offline AMS sulfate (expressed as S)  
 183 with sulfur measured by X-ray fluorescence (XRF), and panels (d) and (f) compare offline  
 184 AMS ammonium and nitrate with concentrations measured by Ion Chromatography (IC).  
 185 Offline AMS sulfate is intrinsically linked to IC sulfate through its use as the internal standard  
 186 and is therefore treated equivalently in this comparison. Offline AMS ammonium and nitrate  
 187 are quantified using sulfate as the internal standard, assuming a unity calibration slope. Online  
 188 AMS concentrations represent time-averaged values over each corresponding filter sampling

189 interval, while offline AMS concentrations represent the mean across 8 to 12 runs. Data points  
190 are colored by IC sulfur to XRF sulfur ratio in red for (a) and (b), offline AMS ammonium-to-  
191 sulfate ratio in orange for (c) and (d), and offline AMS  $\text{NO}^+/\text{NO}_2^+$  ratio in blue for (e) and (f).  
192 Annotations indicate the reduced major axis fit ( $y$ ) for (b) and the ordinary least-squares fit ( $y$ )  
193 for the remaining panels, coefficient of determination ( $r^2$ ), number of comparison points ( $N$ ),  
194 Normalized Mean Bias (NMB), and Normalized Root Mean Square Deviation (NRMSE). The  
195 dashed line indicates the 1:1 reference.

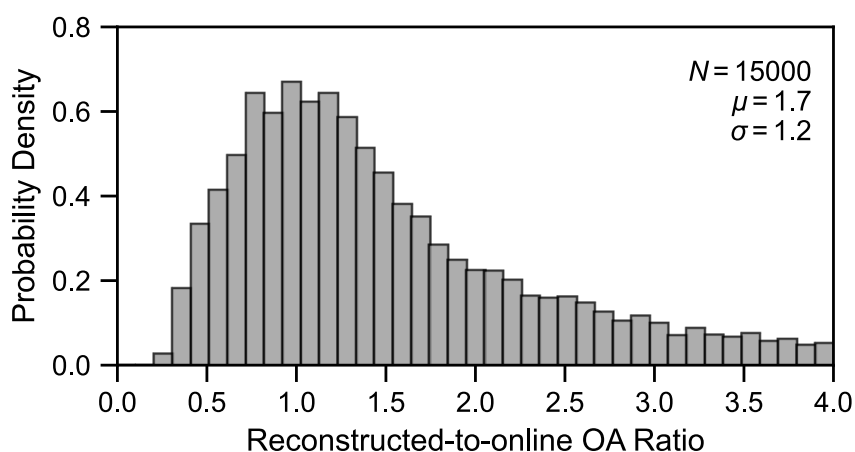

196  
197 Figure S9. Histogram of reconstructed-to-online OA concentration ratios for samples collected  
198 in St. Louis. Reconstructed OA is obtained by separating offline OA into oxygenated OA  
199 (OOA) and hydrocarbon-like OA (HOA) using weighted non-negative least-squares (NNLS)  
200 regression, and extrapolating each factor by its corresponding recovery. The regression uses  
201 factor profiles derived from this study (online AMS) and four additional OOA and HOA profile  
202 pairs from the AMS Spectral Database. OOA and HOA recoveries are sampled 100 times from  
203 representative ranges (0.36–0.92 for OOA and 0.028–0.17 for HOA) based on this and previous  
204 offline AMS studies. Calculations are performed for 30 samples using five factor-profile  
205 combinations and 100 bootstrap realizations per combination. Online OA represents the time-  
206 averaged concentration over each corresponding filter sampling interval. Annotations indicate  
207 the number of points ( $N$ ), and the mean ( $\mu$ ) and standard deviation ( $\sigma$ ) of the fitted normal  
208 distribution.

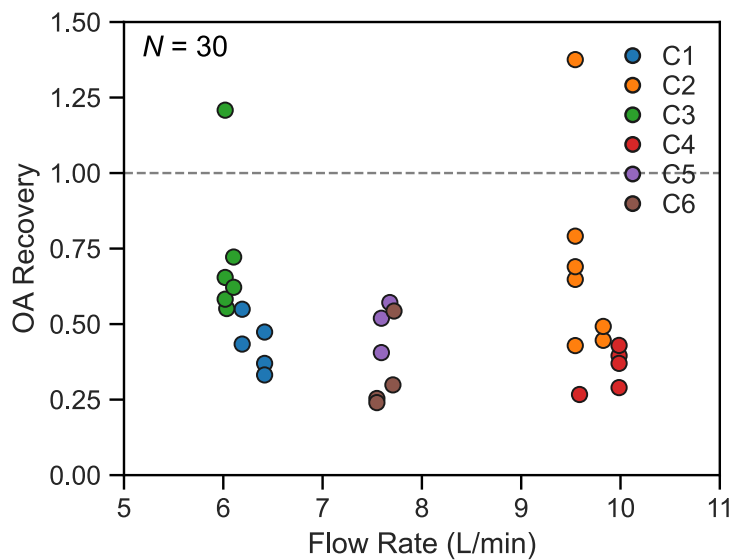

209

210 Figure S10. OA recovery compared to the flow rate upstream of the PM cyclone. A flow rate  
 211 of 5 L/min corresponds to a cut size of  $PM_{2.5}$ , while 11 L/min corresponds to a  $PM_1$  cut size.  
 212 Data are shown for individual filters collected in St. Louis and are colored by cartridge (C1–  
 213 C6).

214 **References**

- 215 Bahreini, R., Ervens, B., Middlebrook, A.M., Warneke, C., de Gouw, J.A., DeCarlo, P.F.,  
216 Jimenez, J.L., Brock, C.A., Neuman, J.A., Ryerson, T.B., Stark, H., Atlas, E., Brioude, J., Fried,  
217 A., Holloway, J.S., Peischl, J., Richter, D., Walega, J., Weibring, P., Wollny, A.G., and  
218 Fehsenfeld, F.C.: Organic aerosol formation in urban and industrial plumes near Houston and  
219 Dallas, Texas, *J. Geophys. Res.-Atmos.*, 114, D00F16, 2009.
- 220 Day, D.A., Wooldridge, P.J., Dillon, M.B., Thornton, J.A., and Cohen, R.C.: A thermal  
221 dissociation laser-induced fluorescence instrument for in situ detection of NO<sub>2</sub>, peroxy nitrates,  
222 alkyl nitrates, and HNO<sub>3</sub>, *J. Geophys. Res.-Atmos.*, 107, ACH 4-1–ACH 4-14, 2002.
- 223 Farmer, D.K., Matsunaga, A., Docherty, K.S., Surratt, J.D., Seinfeld, J.H., Ziemann, P.J., and  
224 Jimenez, J.L.: Response of an aerosol mass spectrometer to organonitrates and organosulfates  
225 and implications for atmospheric chemistry, *Proc. Natl. Acad. Sci. USA*, 107, 6670–6675, 2010.
- 226 Li, C., Martin, R.V., van Donkelaar, A., Jimenez, J.L., Zhang, Q., Turner, J.R., Liu, X., Rowe,  
227 M., Meng, J., Yu, W., and Thurston, G.D.: Estimates of submicron particulate matter (PM<sub>1</sub>)  
228 concentrations for 1998–2022 across the contiguous USA: Leveraging measurements of PM<sub>1</sub>  
229 with nationwide PM<sub>2.5</sub> component data, *Lancet Planet. Health*, 9, e491–e502, 2025.
- 230 Liu, X., Turner, J.R., Oxford, C.R., McNeill, J., Walsh, B., Le Roy, E., Weagle, C.L., Stone,  
231 E., Zhu, H., Liu, W., Wei, Z., Hyslop, N.P., Giacomo, J., Dillner, A.M., Salam, A., Hossen,  
232 A.-A., Islam, Z., Abboud, I., Akoshile, C., Amador-Munoz, O., Anh, N.X., Asfaw, A.,  
233 Balasubramanian, R., Chang, R.Y.W., Coburn, C., Dey, S., Diner, D.J., Dong, J., Farrah, T.,  
234 Gahungu, P., Garland, R.M., Grutter de la Mora, M., Hasheminassab, S., John, J., Kim, J., Kim,  
235 J.S., Langerman, K., Lee, P.C., Lestari, P., Liu, Y., Mamo, T., Martins, M., Mayol-Bracero,  
236 O.L., Naidoo, M., Park, S.S., Schechner, Y., Schofield, R., Tripathi, S.N., Windwer, E., Wu,  
237 M.T., Zhang, Q., Brauer, M., Rudich, Y., and Martin, R.V.: Elemental characterization of  
238 ambient particulate matter for a globally distributed monitoring network: Methodology and  
239 implications, *Environ. Sci. Technol. Air*, 1, 283–293, 2024.
- 240 Middlebrook, A.M., Bahreini, R., Jimenez, J.L., and Canagaratna, M.R.: Evaluation of  
241 composition-dependent collection efficiencies for the aerodyne aerosol mass spectrometer  
242 using field data, *Aerosol Sci. Technol.*, 46, 258–271, 2012.
- 243 Srivastava, D., Daellenbach, K.R., Zhang, Y., Bonnaire, N., Chazeau, B., Perraudin, E., Gros,  
244 V., Lucarelli, F., Villenave, E., Prevot, A.S.H., El Haddad, I., Favez, O., and Albinet, A.:

245 Comparison of five methodologies to apportion organic aerosol sources during a PM pollution  
246 event, *Sci. Total Environ.*, 757, 143168, 2021.

247 Xu, L., Suresh, S., Guo, H., Weber, R.J., and Ng, N.L.: Aerosol characterization over the  
248 southeastern United States using high-resolution aerosol mass spectrometry: Spatial and  
249 seasonal variation of aerosol composition and sources with a focus on organic nitrates, *Atmos.*  
250 *Chem. Phys.*, 15, 7307–7336, 2015.

251 Xu, W., Lambe, A., Silva, P., Hu, W., Onasch, T., Williams, L., Croteau, P., Zhang, X.,  
252 Renbaum-Wolff, L., Fortner, E., Jimenez, J.L., Jayne, J., Worsnop, D., and Canagaratna, M.:  
253 Laboratory evaluation of species-dependent relative ionization efficiencies in the aerodyne  
254 aerosol mass spectrometer, *Aerosol Sci. Technol.*, 52, 626–641, 2018.
